# Supplementary material for: Investigation on the Essential Oils of the Achillea Species: From Chemical Analysis to the In Silico Uptake against SARS-CoV-2 Main Protease
Source: MDPI journal article supplement (doi:10.3390/life13020378), 2023-01-30
Supplement: s1 [file s1]

## Supplementary Materials

### Investigation on Essential Oils of *Achillea* Species: From Chemical Analysis to *In Silico* Uptake against SARS-CoV-2 Main Protease

Hossein Rabbi Angourani <sup>1</sup>, Armin Zarei <sup>2,\*</sup>, Maryam Manafi Moghadam <sup>2</sup>, Ali Ramazani <sup>1,2,\*</sup>, Andrea Mastinu <sup>3,\*</sup>

<sup>1</sup>Department of Biotechnology, Research Institute of Modern Biological Techniques (RIMBT), University of Zanjan, Zanjan 45371-38791, Iran

<sup>2</sup>Department of Chemistry, Faculty of Science, University of Zanjan, Zanjan 45371-38791, Iran

<sup>3</sup>Department of Molecular and Translational Medicine, University of Brescia, viale Europa 11, 25123 Brescia, Italy

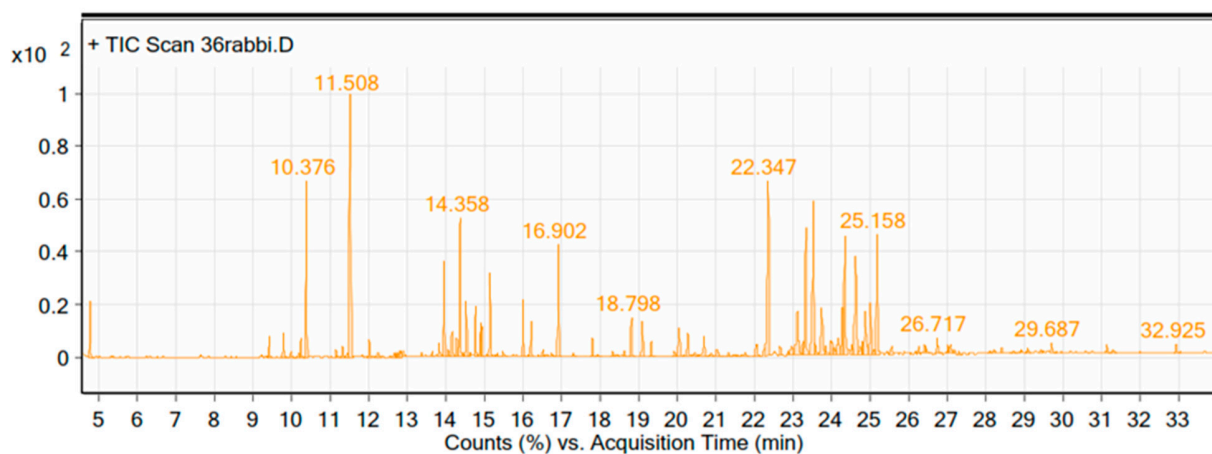

**Figure S1.** Chromatogram of GC-MS analysis of essential oil of *Achillea millefolium* in Zanjan region

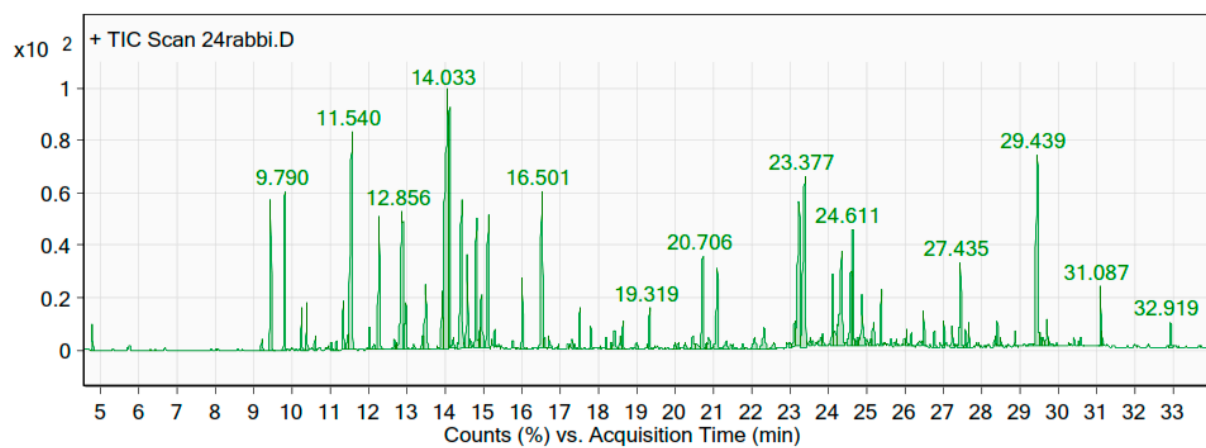

**Figure S2.** Chromatogram of GC-MS analysis of essential oil of *Achillea wilhelmsii* C. Koch in Zanzan region.

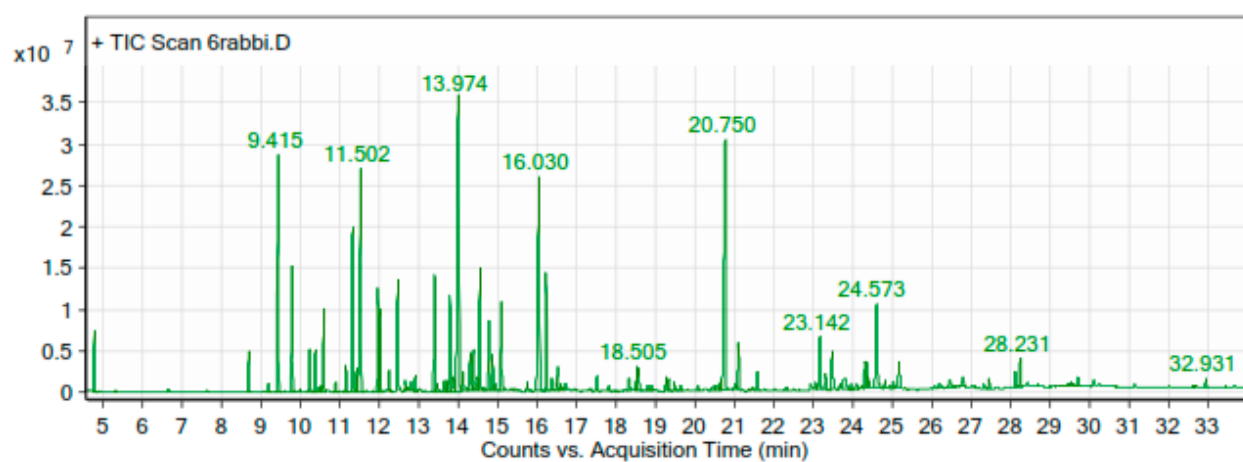

**Figure S3.** Chromatogram of GC-MS analysis of essential oil of vegetative body of *Achillea tenuifolia* Lam in Zanzan region

## I: SARS-CoV-2 3CL<sup>pro</sup>

a)

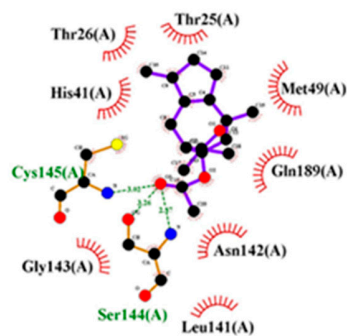

b)

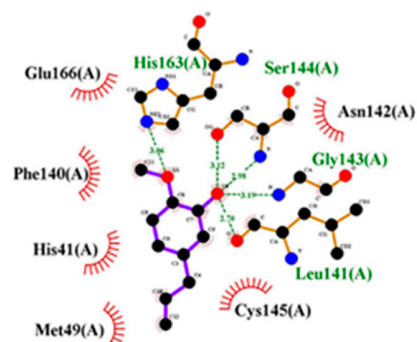

c)

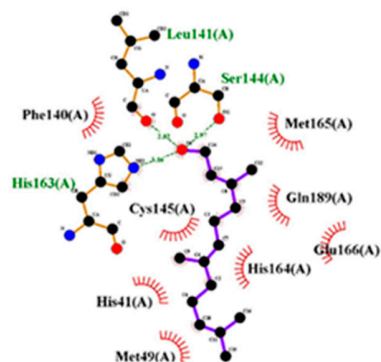

d)

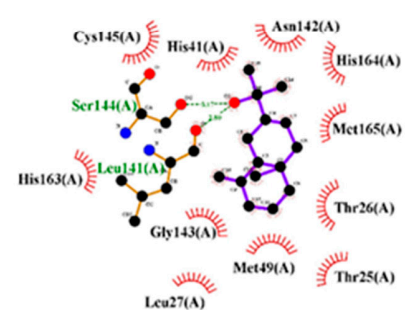

## II: SARS-CoV-1 3CL<sup>pro</sup>

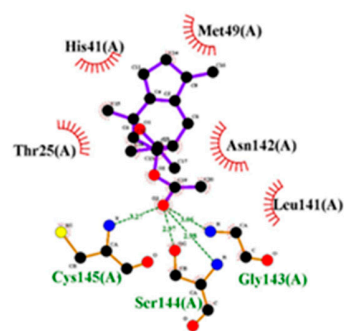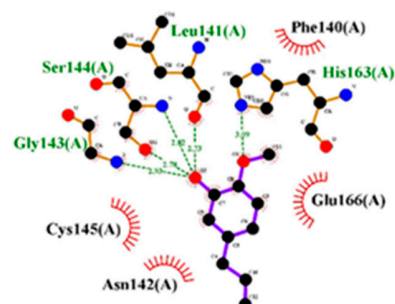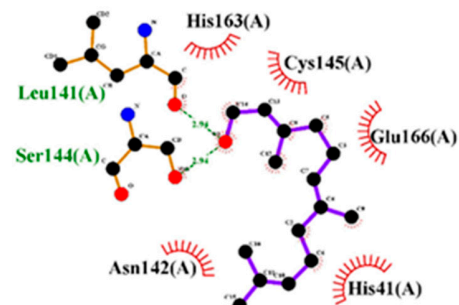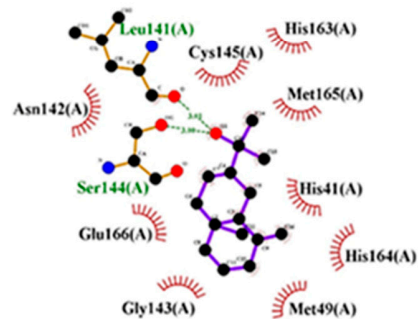

**Figure S4.** 2D illustration of interactions between candidate compounds and viral polymerases; (I: SARS-CoV-2 3CL<sup>pro</sup>: 6NUR, II: SARS-CoV-2 3CL<sup>pro</sup>: 2H2Z): a) Kessanyl acetate, b) Chavibetol (m-Eugenol), c) Farnesol, d) 7-epi- $\beta$ -Eudesmol.
